# Supplementary material for: The actomyosin interface contains an evolutionary conserved core and an ancillary interface involved in specificity
Source: PubMed Central journal article supplement (PMC7994445; doi:10.1038/s41467-021-22093-4), 2021-03-25
Supplement: 41467_2021_22093_MOESM1_ESM.pdf [file 41467_2021_22093_MOESM1_ESM.pdf]

**Supplementary Information for:**

## **The Actomyosin interface contains an evolutionary conserved core and an ancillary interface involved in specificity**

Julien Robert-Paganin<sup>1</sup>, Xiao-Ping Xu<sup>2</sup>, Mark F. Swift<sup>2</sup>, Daniel Auguin<sup>1,3</sup>, James P. Robblee<sup>4</sup>, Hailong Lu<sup>4</sup>, Patricia M. Fagnant<sup>4</sup>, Elena B. Kremetsova<sup>4</sup>, Kathleen M. Trybus<sup>4</sup>, Anne Houdusse<sup>1\*</sup>, Niels Volkmann<sup>2,5\*</sup>, and Dorit Hanein<sup>1,6</sup>

<sup>1</sup> Structural Motility, Institut Curie, CNRS, UMR 144, F-75005 Paris, France

<sup>2</sup> Scintillon Institute, San Diego, CA USA 92121

<sup>3</sup> Laboratoire de Biologie des Ligneux et des Grandes Cultures (LBLGC), Université d'Orléans, INRAE, USC1328, 45067 Orléans, France

<sup>4</sup> Department of Molecular Physiology & Biophysics, University of Vermont, Burlington, VT USA 05446

<sup>5</sup> Structural Image Analysis Unit, Department of Structural Biology & Chemistry, Institut Pasteur, CNRS UMR 3528, 75015 Paris, France

<sup>6</sup> Structural Studies of Macromolecular Machines in Cellulo Unit, Department of Structural Biology & Chemistry, Institut Pasteur, CNRS UMR 3528, 75015 Paris, France

\* Co-corresponding authors Niels Volkmann and Anne Houdusse:

Emails: niels.volkmann@pasteur.fr; anne.houdusse@curie.fr

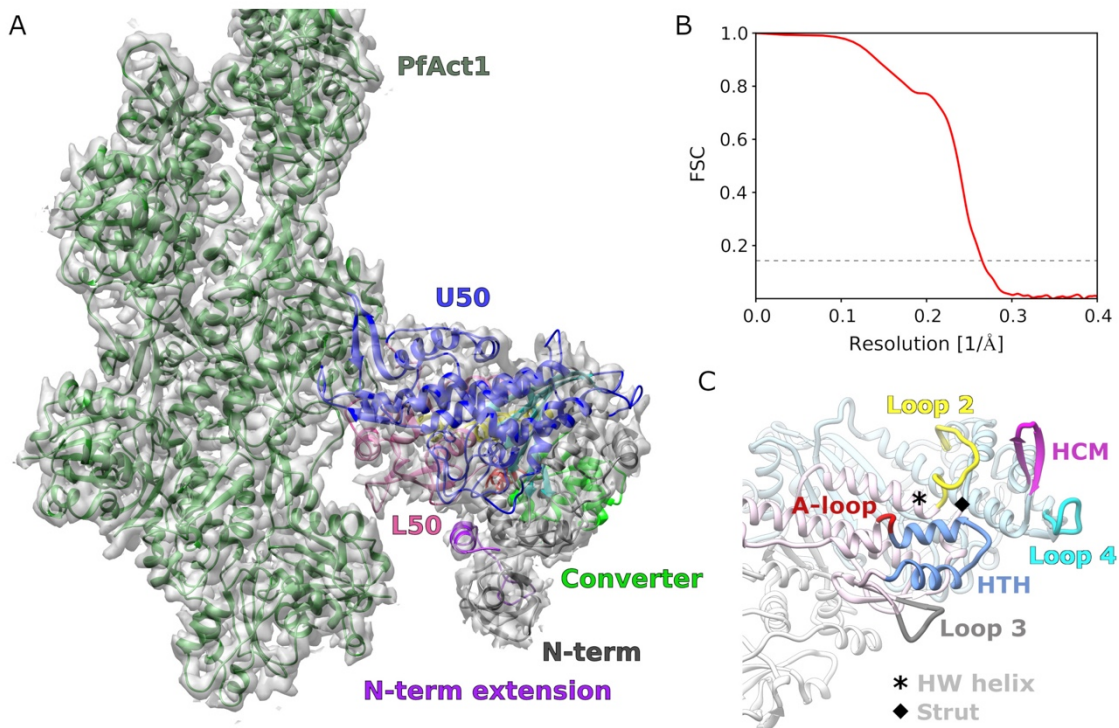

**Supplementary Figure 1:** Structure of the PfMyoA motor domain/PfAct1 filament assembly **(A)** Overview of the PfAct1/PfMyoA atomic model inside the density map with structural elements of PfMyoA colored in. The pointed end of the filament is up. 'L50' denotes 'lower 50kDa domain'. 'U50' denotes 'upper 50kDa domain'. **(B)** Fourier shell correlation (FSC) curve between two independently derived reconstructions using random half data sets. The 0.143 cutoff (dashed line) indicates a resolution of 3.8 Å. **(C)** Atomic model of PfAct1-bound PfMyoA motor domain with the primary structural elements participating in interactions colored distinctly and labeled (see also supplemental Table 2). 'HCM' denotes hypertrophic cardiomyopathy loop', 'HTH' denotes 'helix-turn-helix motif', and 'A-loop' denotes 'Activation loop'. The element that bridges the cleft between U50 and L50 ('Strut') is labeled with a diamond. The helix that follows Loop 2 in L50 ('HW helix') is labeled with an asterisk. This orientation is turned 180° around the filament axis from the orientation in A.

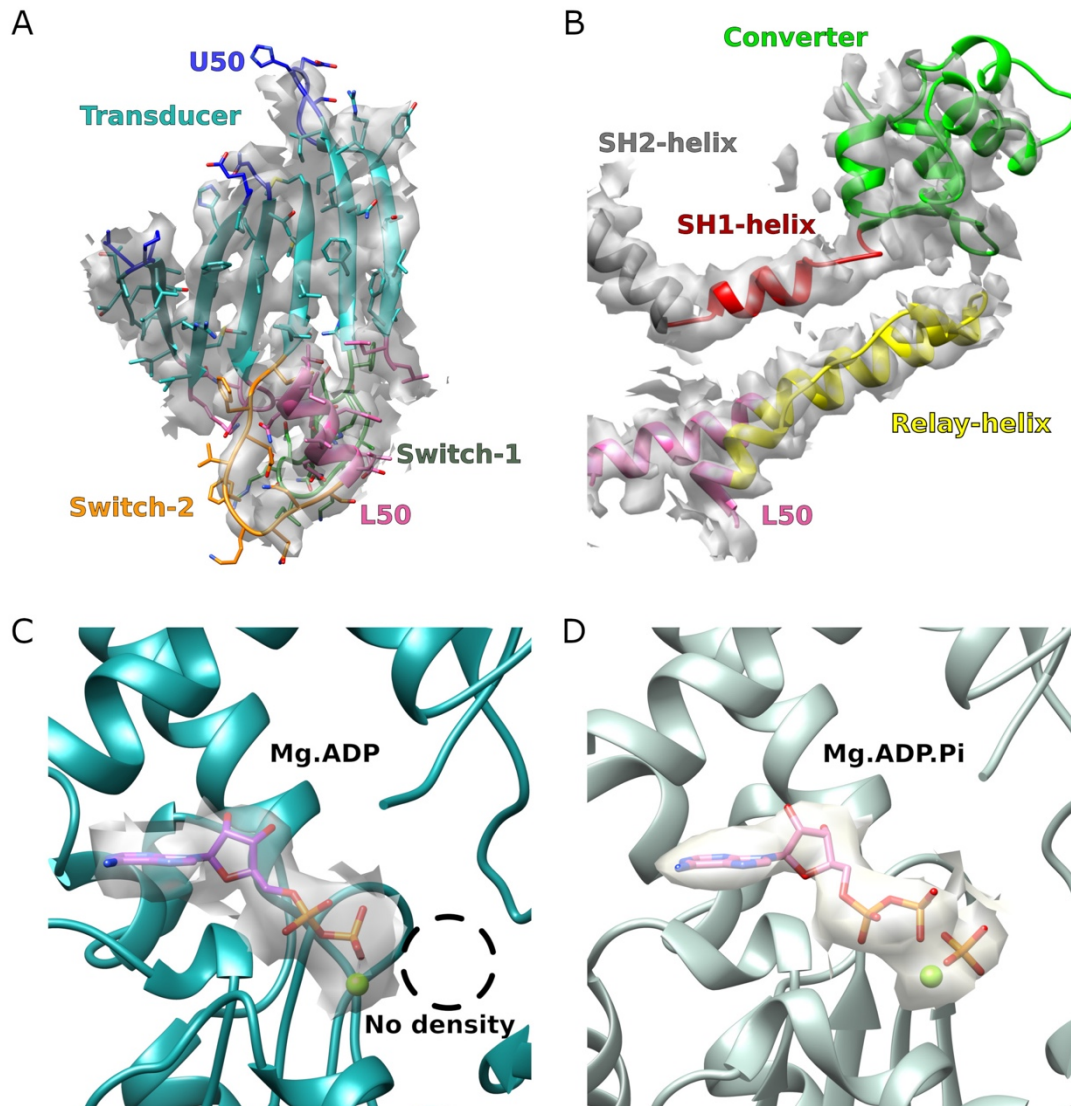

**Supplementary Figure 2:** *Structural details of the PfMyoA-PfAct1 assembly* (**A, B**) Density map and atomic model of the connectors within the motor domain of PfMyoA. The region close to the Transducer and the active site is shown in A. The region close to the Converter, the SH1-helix, and the Relay is shown in B. (**C**) MgADP is present in PfAct1 monomers from the PfActomyoA structure. No density is present at the place of the Pi. (**D**) In order to compare, the density of the nucleotide from an actin filament with bound MgADP.Pi (PDB code 6FHL), where the Pi is undeniably visualized in the density map.

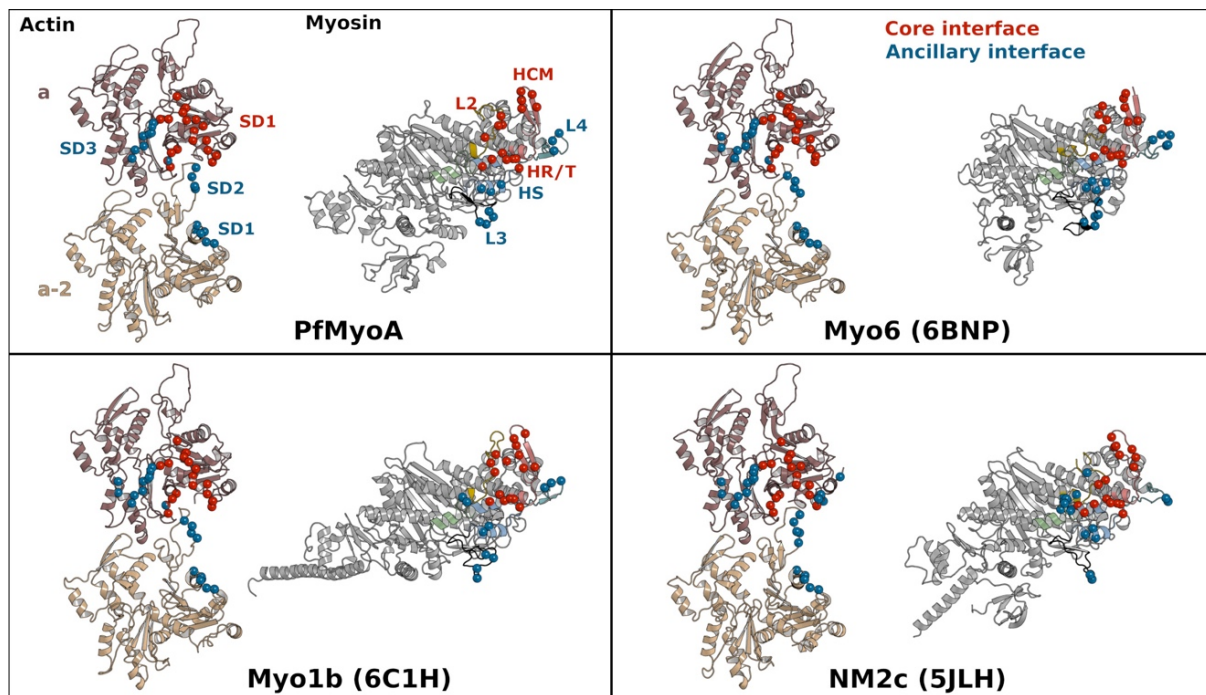

**Supplementary Figure 3: Actomyosin footprint analysis details.** Open book representation of the different structures of Rigor actomyosin complexes solved at high resolution: PfMyoA, myosin 6 (Myo6), myosin 1b (Myo1b), non-muscle myosin 2c (NM2c). Both on actin and on the myosin, residues part of core interface (in red) and ancillary interface (in blue) are shown as spheres. The hypertrophic cardiomyopathy loop (HCM), loop 2 (L2), loop 3 (L3) and loop 4 (L4) and the helix-turn-helix motif of myosin are labeled in the PfMyoA panel, colored according to whether the respective structural element primarily contributes to the core or the ancillary interface. The helix-turn-helix motif is split into the HR helix and the turn (HR/T) and the HS helix (HS). The subdomains of actin (SD) are also labeled and colored according to their primary contribution.

**Supplementary Table 1.** *Statistics for data acquisition, processing, and model refinement*

| <b>Data collection</b>                |                |
|---------------------------------------|----------------|
| Microscope                            | Titan Krios    |
| Voltage [kV]                          | 300            |
| Detector                              | Falcon II      |
| Magnification                         | 75,000         |
| <i>Exposure parameters</i>            |                |
| Total dose [e-/Å <sup>2</sup> ]       | 60             |
| Exposure time [s]                     | 1              |
| Pixel size [Å]                        | 1.035          |
| Defocus range [µm]                    | -0.7 to -2.8   |
| <b>Data processing</b>                |                |
| Images used                           | 6,073          |
| Initial segments                      | 509,035        |
| Final segments                        | 464,646        |
| <i>Helical symmetry</i>               |                |
| Rise [Å]                              | 27.3           |
| Twist [°]                             | -168.1         |
| Resolution [Å]                        | 3.8            |
| FSC threshold                         | 0.143          |
| Sharpening B-factor [Å <sup>2</sup> ] | -93            |
| <b>Refinement</b>                     |                |
| Initial models [PDB IDs]              | 5ogw, 6i7d (D) |
| Non-hydrogen atoms                    | 20,498         |
| Model resolution [Å]                  | 3.8            |
| FSC threshold                         | 0.5            |
| <i>RMSD deviations</i>                |                |
| Bond lengths [Å]                      | 0.008          |
| Bond angles [°]                       | 0.910          |
| Rotamer outliers [%]                  | 0.22           |
| Mean B-factor [Å <sup>2</sup> ]       | 82.2           |
| <b>Validation</b>                     |                |
| Molprobit score                       | 1.74           |
| Clash score                           | 8.84           |
| <i>Ramachandran plot</i>              |                |
| Favored [%]                           | 95.84          |
| Allowed [%]                           | 4.12           |
| Disallowed [%]                        | 0.04           |
| CC (mask)                             | 0.82           |
| CC (volume)                           | 0.80           |
| EMringer score                        | 2.71           |

Supplementary Table 2. Footprint analysis of Rigor actomyosin interactions

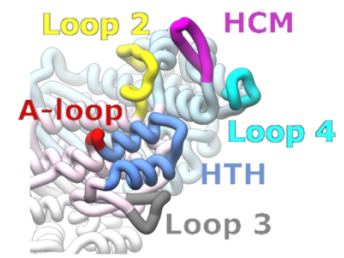

| Table S2A: Core Interface (most conserved among Rigor cryo-EM structures) |                                                                                                                                                                  |                                 |                            |                            |                             |
|---------------------------------------------------------------------------|------------------------------------------------------------------------------------------------------------------------------------------------------------------|---------------------------------|----------------------------|----------------------------|-----------------------------|
| <b>HCM loop</b>                                                           | <i>Actin residues</i>                                                                                                                                            | <i>PfMyoA</i><br>(K410–R422)    | <i>Myo6</i><br>(R393–V409) | <i>NM2c</i><br>(P418–A430) | <i>Myo1b</i><br>(R327–T339) |
| <b>SD3.A</b>                                                              | <sup>Pf</sup> D26/ <sup>Sk</sup> D27; <sup>Pf</sup> A27/ <sup>Sk</sup> A28<br><sup>Pf</sup> P28/ <sup>Sk</sup> P29; <sup>Pf</sup> V31/ <sup>Sk</sup> V32         | T412; V413<br>A414; G415        | M395<br>L396               | I420; K421<br>V422; G423   | V329; E330<br>A331          |
|                                                                           | <sup>Pf</sup> E335/ <sup>Sk</sup> E336                                                                                                                           | T412; I419                      | R393; M395<br>V409         | I420; V427<br>Q428; K429   | R327; V329<br>T338          |
|                                                                           | <sup>Pf</sup> Y338/ <sup>Sk</sup> Y339                                                                                                                           | A414; G415<br><b>D417 (mut)</b> | T397                       | V422; V427                 | A331; E334                  |
| <b>HR helix [HTH]</b>                                                     | <i>Actin residues</i>                                                                                                                                            | <i>PfMyoA</i><br>(S537–C546)    | <i>Myo6</i><br>(G524–N533) | <i>NM2c</i><br>(G549–C558) | <i>Myo1b</i><br>(G455–C464) |
| <b>SD1.A</b>                                                              | <sup>Pf</sup> S351/ <sup>Sk</sup> S352; <sup>Pf</sup> T352/ <sup>Sk</sup> T353                                                                                   | Y541                            |                            | A552 ;L553                 |                             |
|                                                                           | <sup>Pf</sup> L350/ <sup>Sk</sup> L351; <sup>Pf</sup> S351/ <sup>Sk</sup> S352<br><sup>Pf</sup> T352/ <sup>Sk</sup> T353                                         | D544                            | E531                       | E556                       | E462                        |
| <b>HTH turn [HTH]</b>                                                     | <i>Actin residues</i>                                                                                                                                            | <i>PfMyoA</i><br>(L547–T552)    | <i>Myo6</i><br>(R534–S539) | <i>NM2c</i><br>(W559–T564) | <i>Myo1b</i><br>(L465–T471) |
| <b>SD2.A-2</b>                                                            | <sup>Pf</sup> G47/ <sup>Sk</sup> G48                                                                                                                             | A548                            |                            | F560                       | R466                        |
| <b>SD1.A</b>                                                              | <sup>Pf</sup> I346/ <sup>Sk</sup> I347; <sup>Pf</sup> L350/ <sup>Sk</sup> L351                                                                                   | L547                            | R534                       | W559                       |                             |
|                                                                           | <sup>Pf</sup> S349/ <sup>Sk</sup> S350                                                                                                                           | L547                            | R534                       | W559                       | L465                        |
| <b>SD3.A</b>                                                              | <sup>Pf</sup> L350/ <sup>Sk</sup> L351                                                                                                                           | A548                            | L535                       | F560                       |                             |
|                                                                           | <sup>Pf</sup> Y144/ <sup>Sk</sup> Y145; <sup>Pf</sup> G147/ <sup>Sk</sup> G148<br><sup>Pf</sup> R148/ <sup>Sk</sup> R147; <sup>Pf</sup> T149/ <sup>Sk</sup> T150 | P549<br>G550                    | P536<br>Q537               | P561<br>K562               | P467<br>G468                |
| <b>Loop 2</b>                                                             | <i>Actin residues</i>                                                                                                                                            | <i>PfMyoA</i><br>(L624–I641)    | <i>Myo6</i><br>(F621–V643) | <i>NM2c</i><br>(I637–V670) | <i>Myo1b</i><br>(L553–A570) |
| <b>SD1.A</b>                                                              | <sup>Pf</sup> G24/ <sup>Sk</sup> G25; <sup>Pf</sup> D25/ <sup>Sk</sup> D26<br><sup>Pf</sup> D26/ <sup>Sk</sup> D27                                               | G633<br>K634                    | A635; G636<br>K637; L638   | R663; M666<br>F667         | L564; K565<br>R566          |
|                                                                           | <sup>Pf</sup> S345/ <sup>Sk</sup> S346; <sup>Pf</sup> I346/ <sup>Sk</sup> I347                                                                                   | K634                            |                            | F667                       | R566                        |
|                                                                           | <sup>Pf</sup> S349/ <sup>Sk</sup> S350                                                                                                                           | K637                            |                            | F667                       | R566                        |
| <b>Strut</b>                                                              | <i>Actin residues</i>                                                                                                                                            | <i>PfMyoA</i><br>(K602–G607)    | <i>Myo6</i><br>(N598–M603) | <i>NM2c</i><br>(M615–D620) | <i>Myo1b</i><br>(N531–R536) |
| <b>SD1.A</b>                                                              | <sup>Pf</sup> D26/ <sup>Sk</sup> D27                                                                                                                             | R606                            |                            |                            | R536                        |

| Table S2B: Ancillary interface (not conserved among Rigor cryoEM structures) |                                                                                                                                                                                                                                                                                                                                                                                  |                                                  |                                                  |                                    |                                    |
|------------------------------------------------------------------------------|----------------------------------------------------------------------------------------------------------------------------------------------------------------------------------------------------------------------------------------------------------------------------------------------------------------------------------------------------------------------------------|--------------------------------------------------|--------------------------------------------------|------------------------------------|------------------------------------|
| <b>HS helix [HTH]</b>                                                        | Actin residues                                                                                                                                                                                                                                                                                                                                                                   | <i>PfMyoA</i><br>(D553-K565)                     | <i>Myo6</i><br>(D540-H551)                       | <i>NM2c</i><br>(D565-G577)         | <i>Myo1b</i><br>(D472-A484)        |
| <b><i>SD2.A-2</i></b>                                                        | <sup>Pf</sup> G47/ <sup>sk</sup> G48; <sup>Pf</sup> M48/ <sup>sk</sup> M49<br><b><sup>Pf</sup>E49/<sup>sk</sup>G50; <sup>Pf</sup>E50/<sup>sk</sup>Q51</b><br><sup>Pf</sup> K51/ <sup>sk</sup> K52                                                                                                                                                                                | K555; S558<br>T562                               | H542; S545<br>A546; Q549                         | K571<br>Q574<br>E570               | K478<br>Q481                       |
| <b>Loop 4</b>                                                                | Actin residues                                                                                                                                                                                                                                                                                                                                                                   | <i>PfMyoA</i><br>(E369-A380)                     | <i>Myo6</i><br>(E354-N363)                       | <i>NM2c</i><br>(R382-T390)         | <i>Myo1b</i><br>(P288-K299)        |
| <b><i>SD3.A</i></b>                                                          | <sup>Pf</sup> R148/ <sup>sk</sup> R149<br><b><sup>Pf</sup>E312/<sup>sk</sup>D313; <sup>Pf</sup>T315/<sup>sk</sup>Q316</b><br><sup>Pf</sup> K329/ <sup>sk</sup> K330; <sup>Pf</sup> V330/ <sup>sk</sup> I331<br><b><sup>Pf</sup>V331/<sup>sk</sup>I332; <sup>Pf</sup>A332/<sup>sk</sup>A333</b><br><sup>Pf</sup> P333/ <sup>sk</sup> P334; <sup>Pf</sup> P334/ <sup>sk</sup> P335 | S376<br>G374; L375<br>S376                       | T358; G356<br>S357; T358<br>S359; G360           | R384 (tropo)<br>N385               | L295<br>N293<br>N293; G294<br>L295 |
| <b>A-loop</b>                                                                | Actin residues                                                                                                                                                                                                                                                                                                                                                                   | <i>PfMyoA</i><br>(E533-K536)                     | <i>Myo6</i><br>(A520-V523)                       | <i>NM2c</i><br>(R543-P548)         | <i>Myo1b</i><br>(N451-N454)        |
| <b><i>SD1.A</i></b>                                                          | <sup>Pf</sup> S351/ <sup>sk</sup> S352; <sup>Pf</sup> Q354/ <sup>sk</sup> Q355<br><sup>Pf</sup> Q355/ <sup>sk</sup> Q356<br><sup>Pf</sup> E4/ <sup>sk</sup> E5                                                                                                                                                                                                                   |                                                  |                                                  | P544 ; A545<br>N546 ; P548<br>E542 | N452<br>T453                       |
| <b>Loop 3</b>                                                                | Actin residues                                                                                                                                                                                                                                                                                                                                                                   | <i>PfMyoA</i><br>(P572-F581)                     | <i>Myo6</i><br>(I559-F577)                       | <i>NM2c</i><br>(R584-F594)         | <i>Myo1b</i><br>(S491-F510)        |
| <b><i>SD1.A-2</i></b>                                                        | <sup>Pf</sup> Y92/ <sup>sk</sup> Y93; <sup>Pf</sup> N93/ <sup>sk</sup> N94<br><sup>Pf</sup> H88/ <sup>sk</sup> H89<br><sup>Pf</sup> R96/ <sup>sk</sup> R97<br><sup>Pf</sup> R96/ <sup>sk</sup> R97<br><b><sup>Pf</sup>A97/<sup>sk</sup>V98; <sup>Pf</sup>A98/<sup>sk</sup>A99</b>                                                                                                | K574; V575<br>A576; S577<br>A576<br>V575<br>V575 | R561<br>N570; I571<br>R572; E575<br>R561<br>R561 | H587<br>R589<br>L588<br>L588       | M493; L500<br>N501<br>H507<br>N501 |
| <b>Loop 2</b>                                                                | Actin residues                                                                                                                                                                                                                                                                                                                                                                   | <i>PfMyoA</i><br>(L624-I641)                     | <i>Myo6</i><br>(F621-V643)                       | <i>NM2c</i><br>(I637-V670)         | <i>Myo1b</i><br>(L553-A570)        |
| <b><i>SD1.A</i></b>                                                          | <sup>Pf</sup> E4/ <sup>sk</sup> E5                                                                                                                                                                                                                                                                                                                                               |                                                  |                                                  | R663                               |                                    |
| <b>HW helix</b>                                                              | Actin residues                                                                                                                                                                                                                                                                                                                                                                   | <i>PfMyoA</i><br>(G642-T659)                     | <i>Myo6</i><br>(G644-T661)                       | <i>NM2c</i><br>(G671-T688)         | <i>Myo1b</i><br>(G571-K588)        |
| <b><i>SD1.A</i></b>                                                          | <sup>Pf</sup> E4/ <sup>sk</sup> E5                                                                                                                                                                                                                                                                                                                                               |                                                  |                                                  | Q672; K675                         |                                    |

Footprint analysis of Rigor actomyosin interactions (A) List of conserved interactions (core interface). (B) List of interactions that are not conserved among Rigor actomyosin complexes (ancillary interface). See also Fig. 4 and Fig. S3.

Myosin structural elements and actin subdomains are listed in the first column. The structural elements of myosin are colored according to supplementary figure 1C. The helix-turn-helix motif (HTH) is divided into the two helices (HR helix, HS helix) and the turn (HTH turn). 'A-loop' denotes 'activation loop'. Actin subdomains (SD) are indicated in bold italic and '.A' indicates the actin subunit with the main interface and '.A-2' the lower neighbor along the long-pitch helix if the pointed end is up (as in the figures). The second, grey column contains the actin residues partaking in interactions. The 'pf' and 'sk' superscripts indicate '*Plasmodium falciparum*' and 'skeletal' sequences respectively. Residues that show divergent replacements between the two are indicated in bold and red. Residues with conservative replacements are indicated in bold and blue. The remaining four columns list the myosin residues partaking in interactions with the actin residues in the corresponding row. The NM2c residue contacting tropomyosin (R384) is indicated in grey and labeled with '(tropo)'.

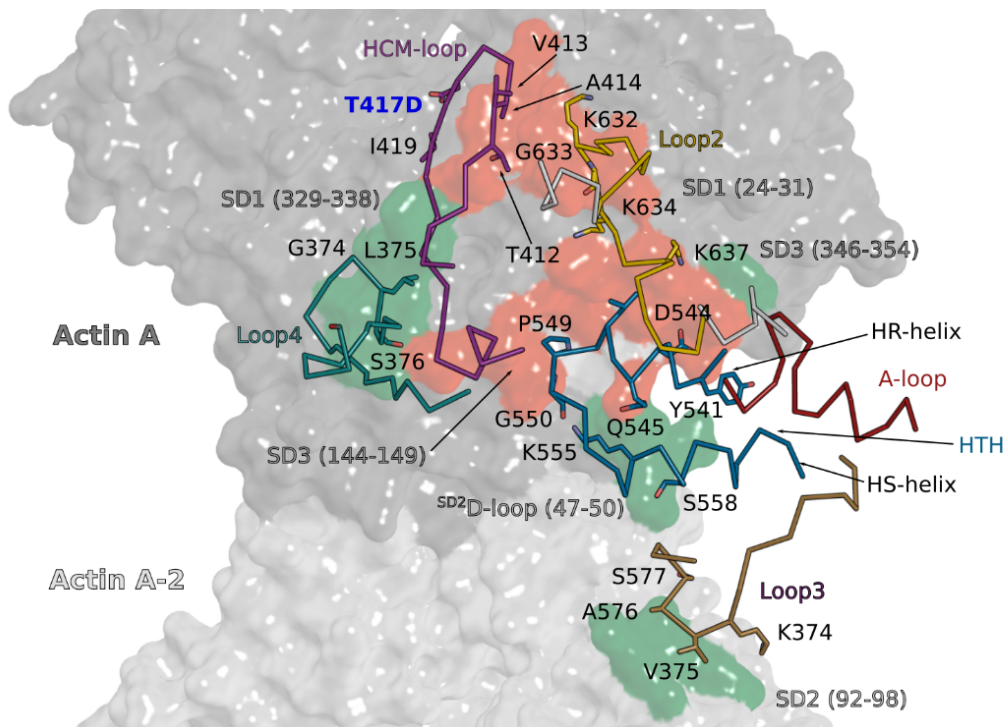

**Supplementary Figure 4:** *Pf-actomyosin interface details.* Two subunits of the PfAct1 filament model are shown in the back as surfaces. The core interface is colored in red and the ancillary interface is colored in green. Structural PfMyoA elements involved in interactions are shown as chain traces with selected residues marked and shown in full-atom stick-representation.



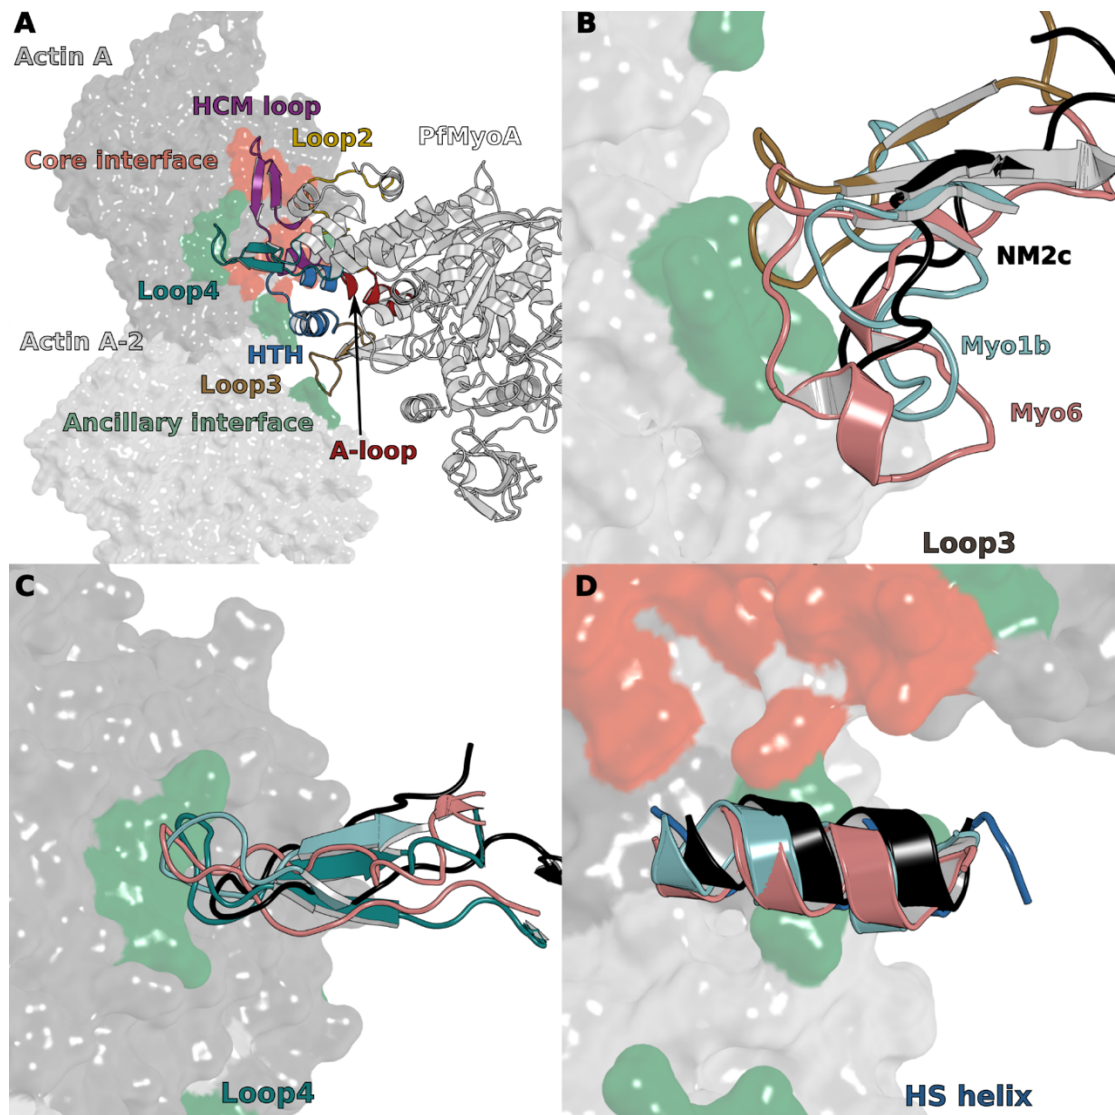

**Supplementary Figure 5: Variability at the Actomyosin interface (A)** overall view of the PfMyoA footprint. The Core interface is colored in red, the Ancillary interface is colored in green. **(B)**, **(C)** and **(D)** show the variability of the elements of the Ancillary interface in PfMyoA compared to NM2c (black), Myo6 (deep salmon) and Myo1b (light cyan). **(B)** shows Loop3, **(C)** shows Loop4 and **(D)** shows the HS helix of HTH.
